# Supplementary material for: Metabolic and diffusional limitations of photosynthesis in fluctuating irradiance in Arabidopsis thaliana
Source: PubMed Central journal article supplement (PMC4977489; doi:10.1038/srep31252), 2016-08-09
Supplement: srep31252-s1.pdf [file srep31252-s1.pdf]

## Supplementary material

### Metabolic and diffusional limitations of photosynthesis in fluctuating irradiance in *Arabidopsis thaliana*

Elias Kaiser, Alejandro Morales, Jeremy Harbinson, Ep Heuvelink, Aina E. Prinzenberg & Leo F.M. Marcelis

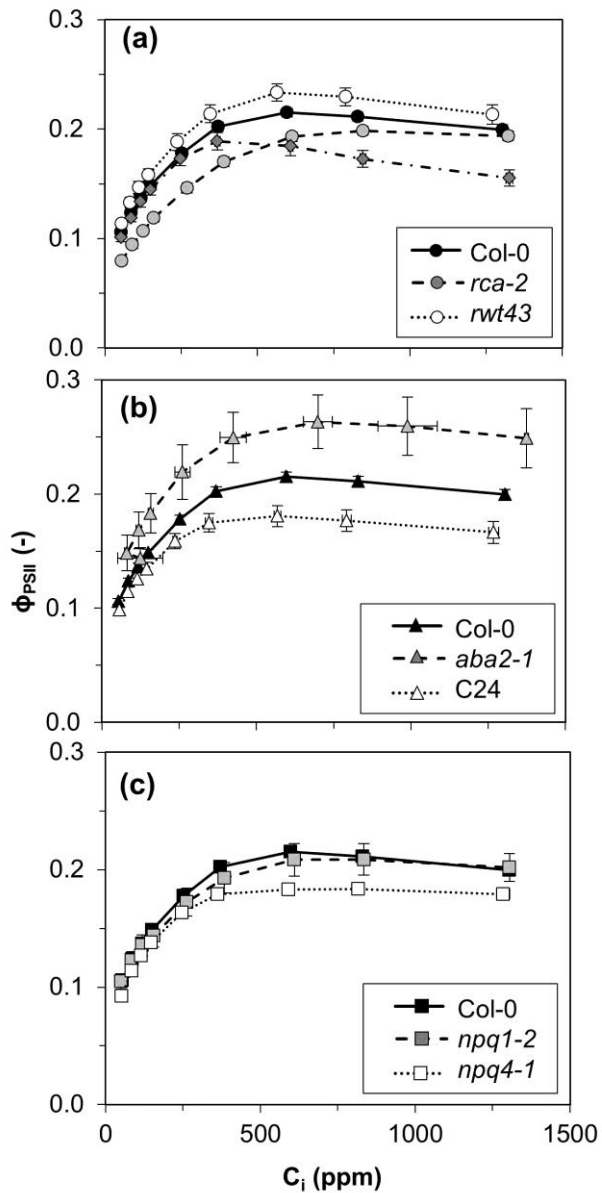

**Supplementary Fig. 1.** CO<sub>2</sub> response of  $\phi_{\text{PSII}}$  in *Arabidopsis* genotypes. Averages  $\pm$  SEM, n = 5-15

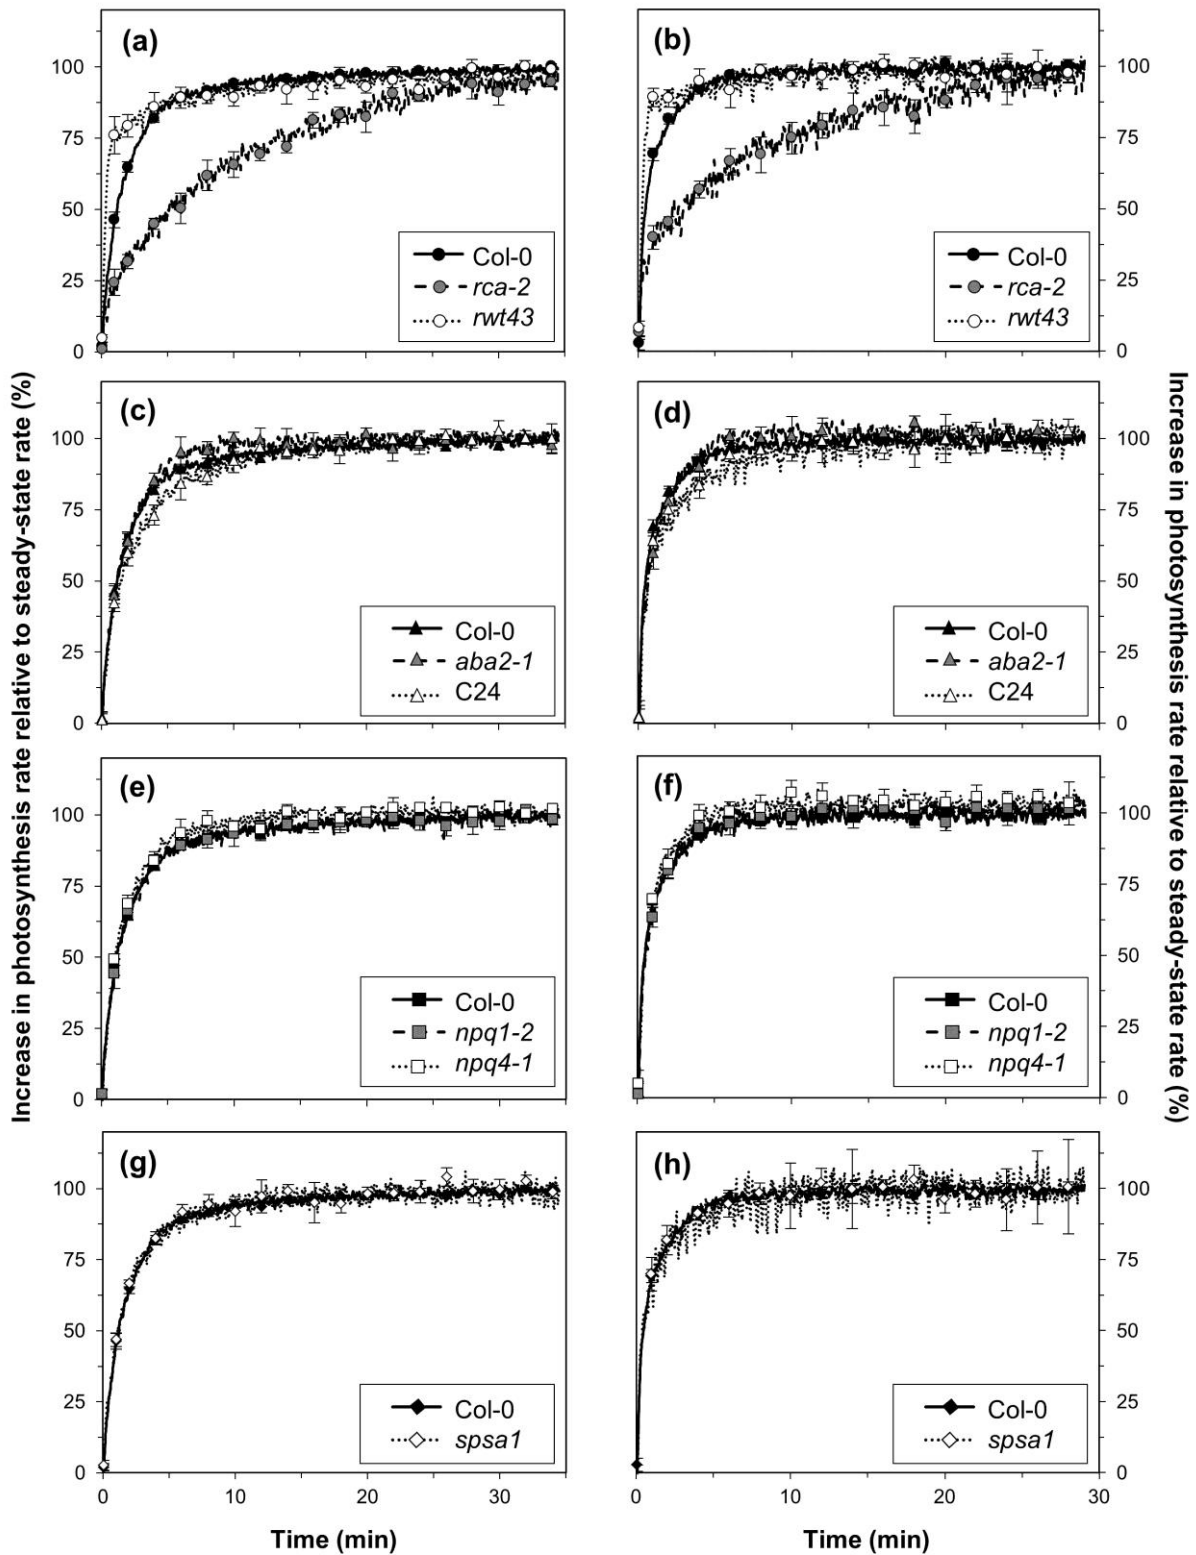

**Supplementary Fig. 2.** Relative responses of net photosynthesis rates to increases in irradiance, from 70 to 800 (left panel: a, c, e, g) and from 130 to 600  $\mu\text{mol m}^{-2} \text{s}^{-1}$  (right panel: b, d, f, h). Averages  $\pm$  SEM,  $n = 5-15$

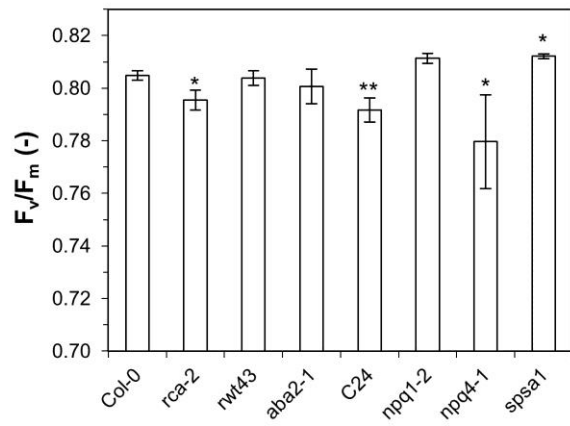

**Supplementary Fig. 3.** Dark-adapted  $F_v/F_m$  in Arabidopsis genotypes after 60 minutes of dark adaptation. Stars denote significant difference from Col-0, as  $P < 0.05$  (\*) and  $P < 0.01$  (\*\*). Averages  $\pm$  SEM,  $n = 5-15$

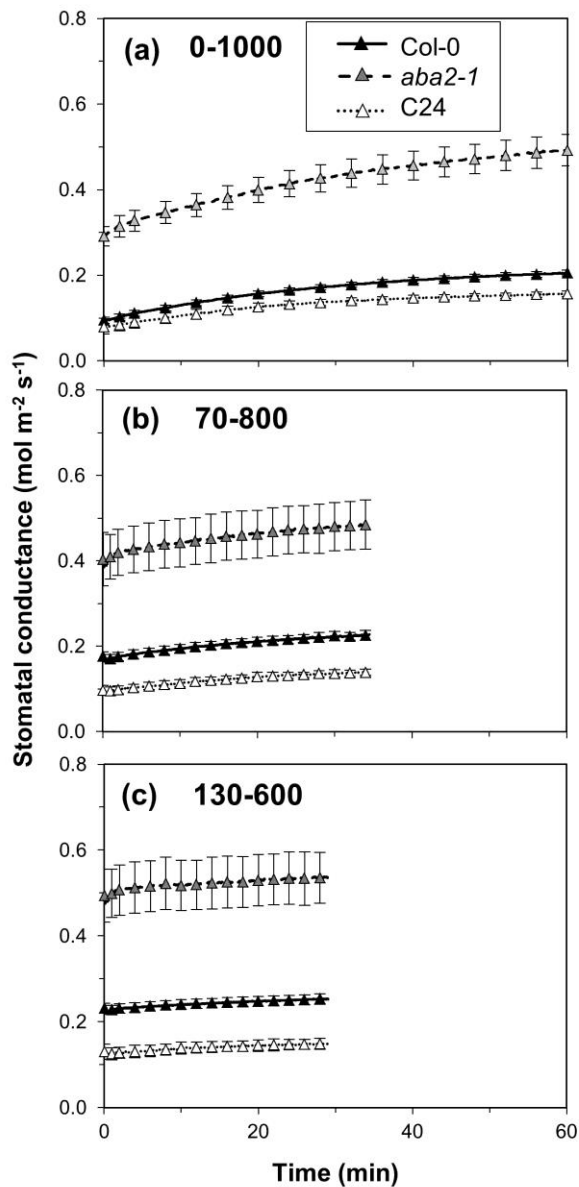

**Supplementary Fig. 4.** Increases in stomatal conductance in Col-0, *aba2-1* and C24 after step increases in irradiance, a) 0→1000, b) 70→800 and c) 130→600  $\mu\text{mol m}^{-2} \text{s}^{-1}$ . Averages  $\pm$  SEM,  $n = 5-15$

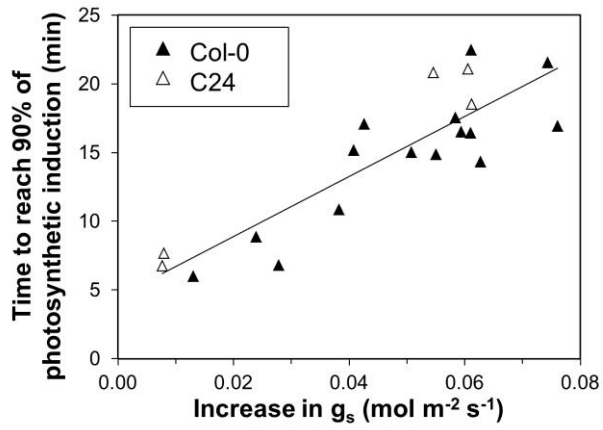

**Supplementary Fig. 5.** Relationship between the increase in  $g_s$  and the time to reach 90% of final photosynthesis rates after a step increase in irradiance (0-1000  $\mu\text{mol m}^{-2} \text{s}^{-1}$ ) in single replicates of Col-0 and C24 ( $R^2 = 0.75$ )

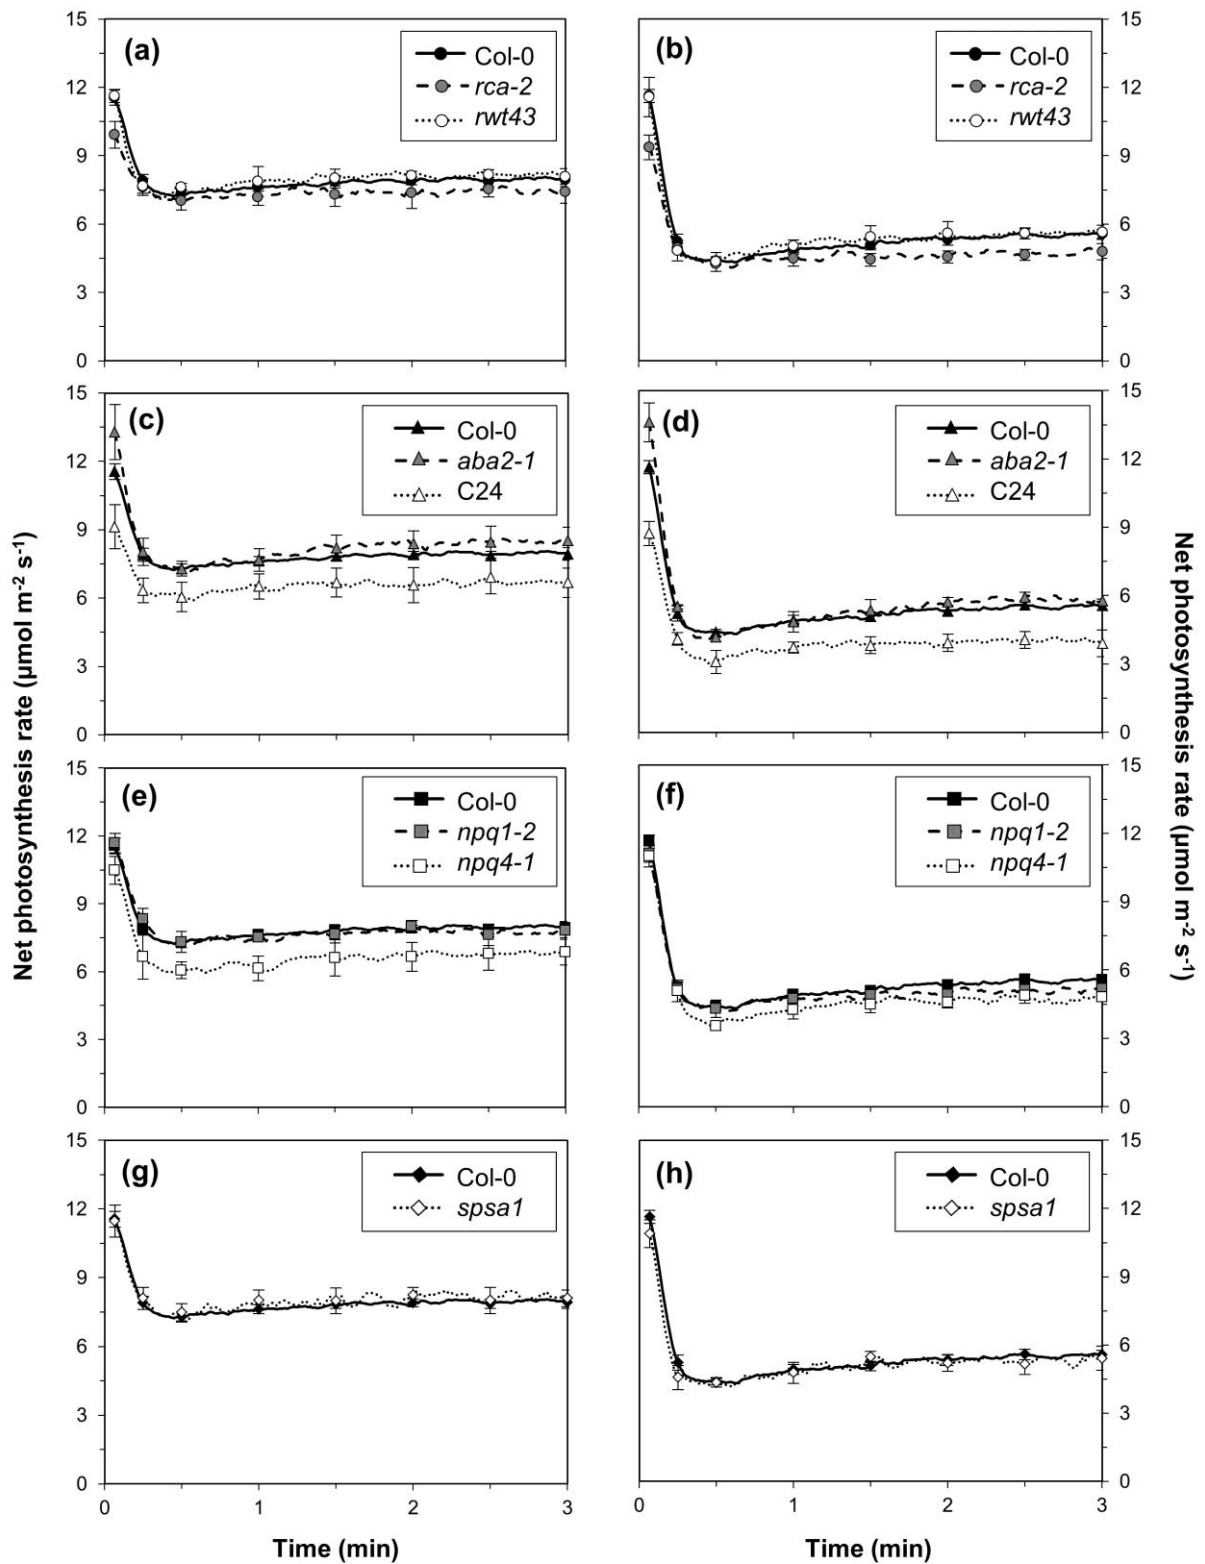

**Supplementary Fig. 6.** Responses of net photosynthesis rates to step decreases in irradiance, from 600 to 200 (left panel: a, c, e, g) and from 800 to 130  $\mu\text{mol m}^{-2} \text{s}^{-1}$  (right panel: b, d, f, h). Averages  $\pm$  SEM,  $n = 5-15$

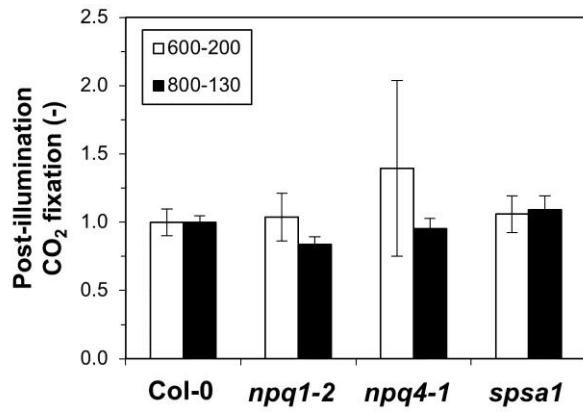

**Supplementary Fig. 7.** Relative post-illumination  $\text{CO}_2$  fixation in Col-0, *npq1-2*, *npq4-1* and *spsa1*. Values are expressed relative to Col-0, which was  $52 \pm 5 \mu\text{mol m}^{-2}$  after  $600 \rightarrow 200 \mu\text{mol m}^{-2} \text{s}^{-1}$  step decreases (white bars) and  $76 \pm 3 \mu\text{mol m}^{-2}$  after  $800 \rightarrow 130 \mu\text{mol m}^{-2} \text{s}^{-1}$  step decreases (black bars). Averages  $\pm$  SEM,  $n = 5-15$

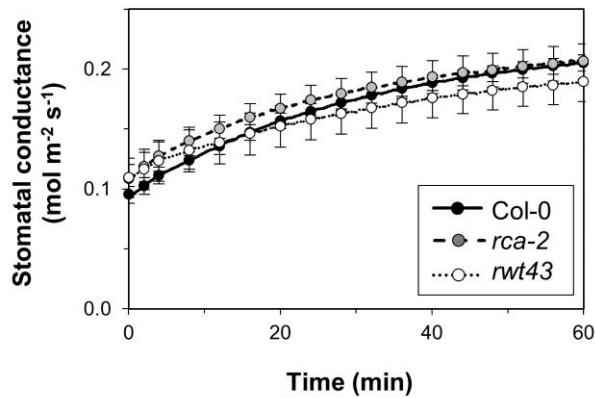

**Supplementary Fig. 8.** Increases in stomatal conductance in genotypes differing in Rubisco activation rate after a  $0-1000 \mu\text{mol m}^{-2} \text{s}^{-1}$  step increase

## Supplementary Text 1: Calculation of Rubisco activase content

Mott and Woodrow<sup>1</sup> calculated the maximum fraction of Rubisco activation ( $f_{RB}$ , achieved at ambient CO<sub>2</sub> concentration and saturating irradiance) from the amount of RCA (mg m<sup>-2</sup>) in a non-linear manner as follows:

$$f_{RB} = \frac{RCA}{RCA + K_A^{RCA}}, \quad (S1)$$

where  $K_A^{RCA}$  (mg m<sup>-2</sup>) is the amount of Rubisco activase at which half of the maximum fraction of Rubisco activation is achieved. Carmo-Silva and Salvucci<sup>2</sup> reported, for leaves of *A. thaliana* Col-0, grown at similar conditions to the plants in our experiments, a maximum fraction of Rubisco activation of 0.91 (i.e. Rubisco is never fully activated). With the value of  $K_A^{RCA} = 12.3$  mg m<sup>-2</sup> reported by Mott and Woodrow<sup>1</sup> we can derive that the amount of Rubisco activase in Col-0 is 124.4 mg m<sup>-2</sup>. Assuming that the total amount of Rubisco in Col-0 and *rca-2* is the same, we deduce the amount of Rubisco activase using Equation S1 and our values of  $V_{cmax}$  in Col-0 ( $53 \pm 1$   $\mu\text{mol m}^{-2} \text{s}^{-1}$ ) and *rca-2* ( $40 \pm 1$   $\mu\text{mol m}^{-2} \text{s}^{-1}$ ), which results in a value of 27 mg m<sup>-2</sup>, that is, 22% of the wildtype level.

### References

- 1 Mott, K. A. & Woodrow, I. E. Modelling the role of Rubisco activase in limiting non-steady-state photosynthesis. *Journal of Experimental Botany* **51**, 399-406 (2000).
- 2 Carmo-Silva, A. E. & Salvucci, M. E. The regulatory properties of Rubisco activase differ among species and affect photosynthetic induction during light transitions. *Plant Physiology* **161**, 1645-1655, doi:10.1104/pp.112.213348 (2013).



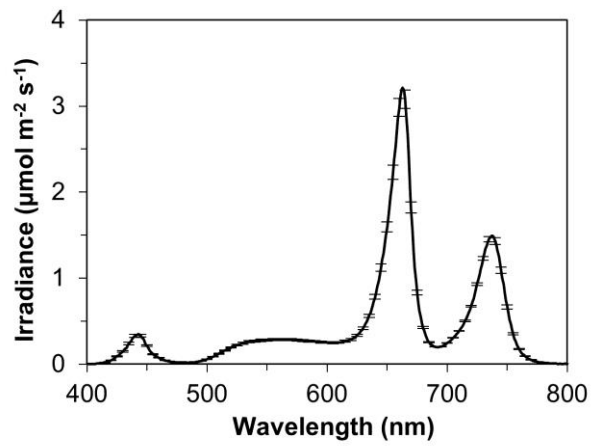

**Supplementary Fig. 9.** Irradiance spectrum in the growth chamber. Average  $\pm$  SEM,  $n = 4$

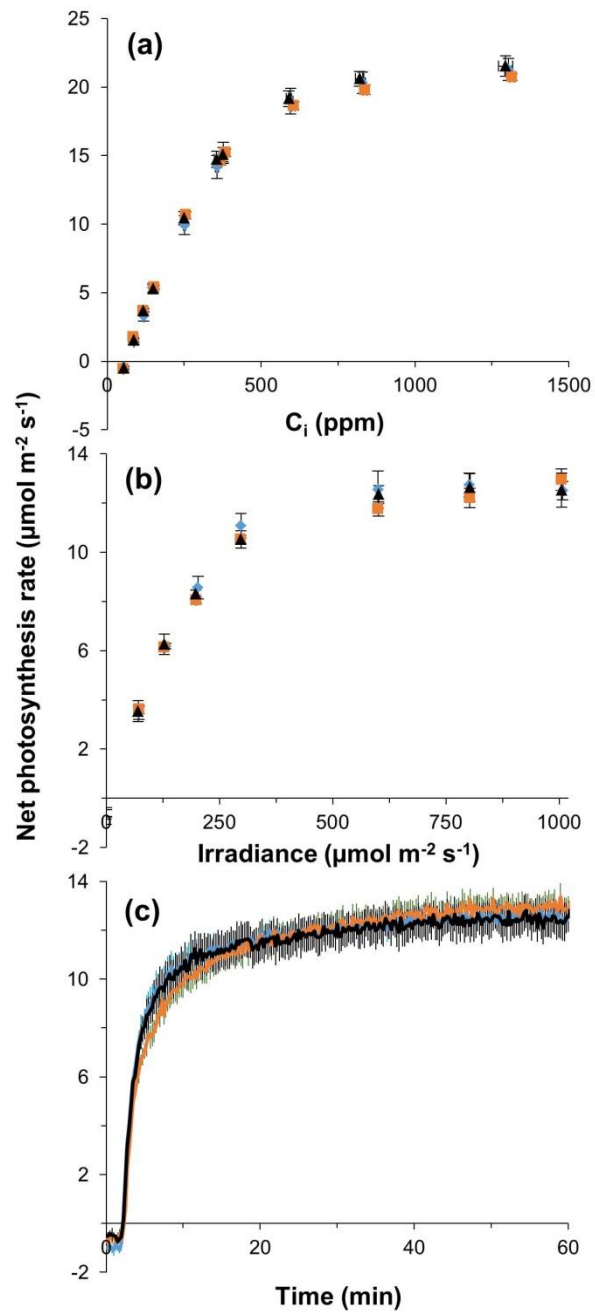

**Supplementary Fig. 10.** CO<sub>2</sub> response (a), irradiance response (b) and photosynthetic induction (c) in three batches of Col-0, grown sequentially in the same growth system. Batch 1, blue symbols; batch 2, orange symbols; batch 3, black symbols. Average  $\pm$  SEM, n = 5

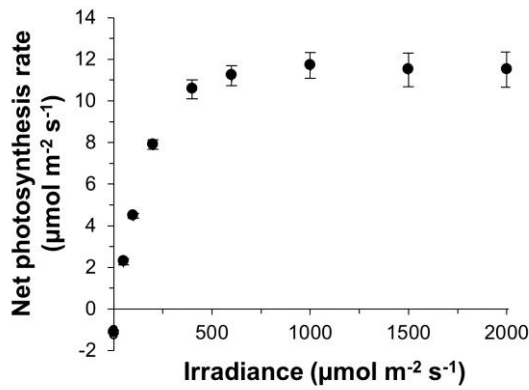

**Supplementary Fig. 11.** Irradiance response curves of net photosynthesis rate determined on leaves of Col-0 prior to starting the main experiment. These data were used to determine the irradiance levels to be used during for stepwise increases and decreases in irradiance

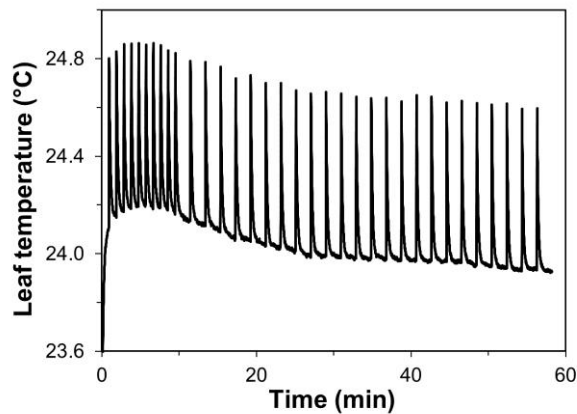

**Supplementary Fig. 12.** Time course of leaf temperature on a leaf of Col-0 after a stepwise increase from 0 to 1000  $\mu\text{mol m}^{-2} \text{s}^{-1}$ . The spikes in leaf temperature are the results of the regular application of saturating flashes used to determine  $F_m'$ , and are representative of all genotypes tested

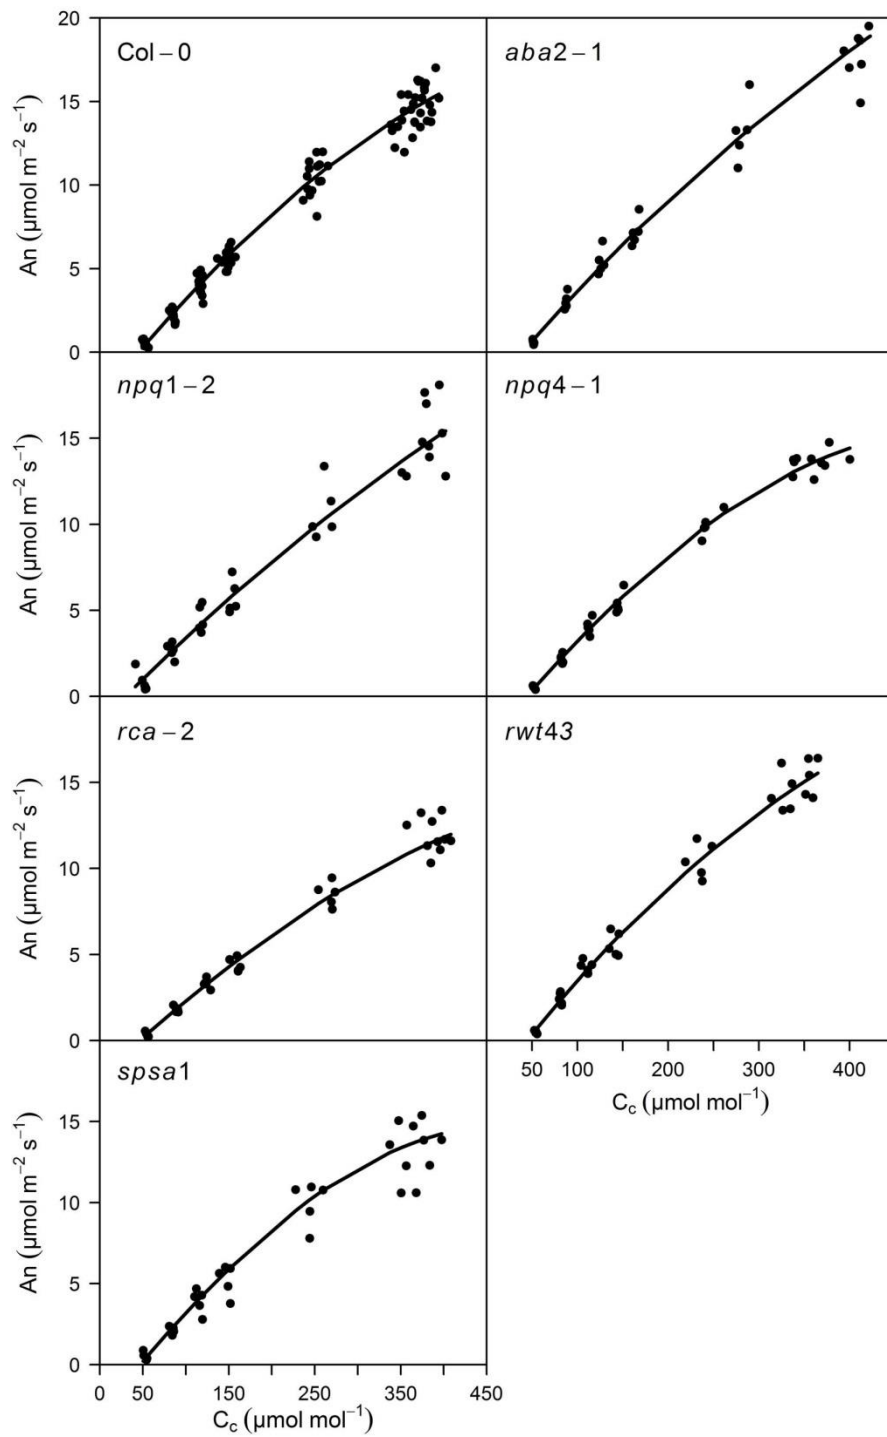

**Supplementary Fig. 13.** Local polynomial regression fits through data depicting the steady-state  $A_n/C_c$  response. The fits were used for correcting the effects of changes in  $C_i$  during photosynthetic induction

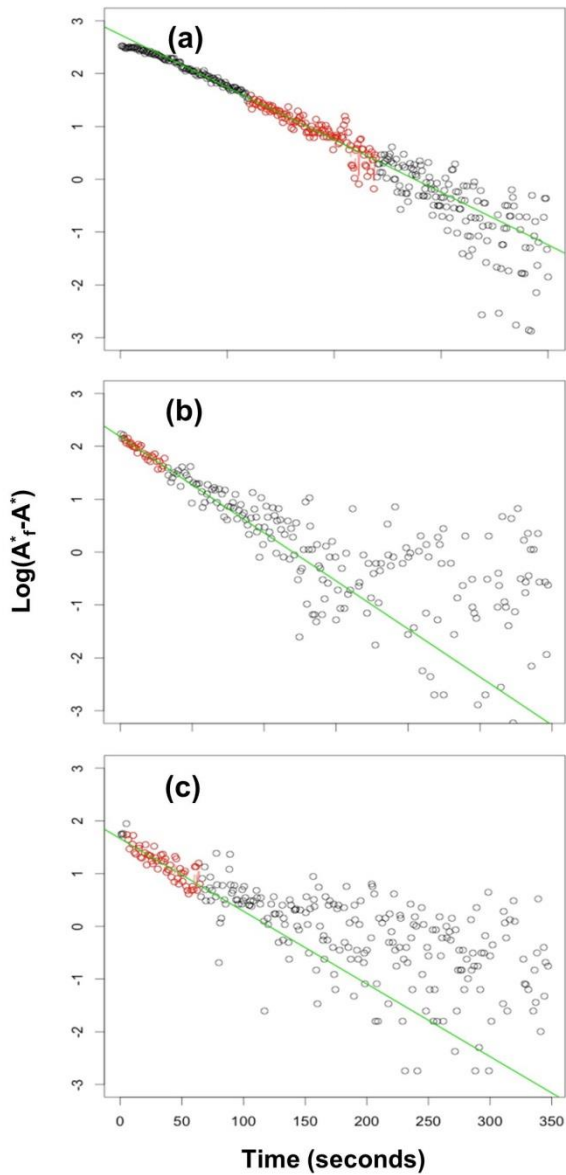

**Supplementary Fig. 14.** Example of data used to calculate the apparent time constant of Rubisco activation ( $\tau_R$ ) after step increases in irradiance a) 0→1000, b) 70→800 and c) 130→600  $\mu\text{mol m}^{-2} \text{s}^{-1}$ . Red dots indicate the data points used to calculate  $\tau_R$ , which is equal to the inverse of the slope of the green line. Explanation of abbreviations on Y-axis: log, natural logarithm;  $A_f$ , steady-state net photosynthesis rate at full photosynthetic induction;  $A^*$ , transient net photosynthesis rate after irradiance increase, corrected for changes in  $C_i$
